# Supplementary material for: Do Environmental Projects Funded by European Structural Investment Funds Enhance Firm Performance in Portugal? The Role of Company Size
Source: Research Square preprint supplement (doi:10.21203/rs.3.rs-6597255/v1), 2025-07-28
Supplement: Supplementary file 1 [file 6667bbe16a5348bb070b9fc7.docx]

Appendix A

Table A.1: Key data of the COMPETE Program 2014-2020 in Portugal

| **KEY ASPECT** | **DESCRIPTION** | | |
| --- | --- | --- | --- |
| **Challenge** | To significantly increase national competitiveness, mobilizing and boosting resources and skills, with a view to creating jobs and regaining momentum of convergence with the most developed economies in the European Union. | | |
| **General Objective** | Improving the competitiveness and internationalization of the Portuguese economy | | |
| **Territorial distribution Funds** | Multi-regional, but mainly geared towards the less developed regions of mainland Portugal - North, Centre and Alentejo (Cohesion Fund projects are national in scope) | | |
| **Financing** | European Regional Programs and National Programs | Total Investment | 6,233 M€ |
| European Funds | 4,414 M€ |
| National Programs | 1,819 M€ |
| **Axis and Themes** | I. STRENGTHENING RESEARCH, TECHNOLOGICAL DEVELOPMENT AND INNOVATION (1,400 M€+679 M€) | Research and Technological Development | |
| Technology Transfer | |
| Scientific and Technological Research Infrastructures | |
| Economic Valorisation of R&D Results | |
| Collective Efficiency Strategies for Networks and Clusters | |
| II. STRENGTHENING THE COMPETITIVENESS OF SME'S AND REDUCING PUBLIC CONTEXT COSTS (1.632 M€+868 M€) | Productive Innovation and Qualified and Creative Entrepreneurship | |
| Qualification and Internationalisation of SMEs | |
| Research & Development | |
| III. PROMOTING SUSTAINABILITY AND JOB QUALITY (396 M€+99 M€) | Training and Capacity Building for Entrepreneurs, Managers and Company Workers | |
| IV. SUSTAINABLE TRANSPORT AND ELIMINATING BOTTLENECKS IN INFRASTRUCTURE NETWORKS (709 M€+125 M€) | Rail transport | |
| Maritime-port transport | |
| Multimodal Logistics Platforms | |
| V. INSTITUTIONAL CAPACITY AND EFFICIENCY OF PUBLIC AUTHORITIES AND STAKEHOLDERS (162 M€+29 M€) | Modernising and Empowering Public Administration | |
| Training for Workers in Public Service | |
| VI. TECHNICAL ASSISTANCE (115 M€+20M€) | Technical Assistance | |

Source: Own elaboration, based on Governo de Portugal (2014c; 2020)
